# Supplementary material for: Automated sample preparation in a microfluidic culture device for cellular metabolomics
Source: Royal Society of Chemistry journal article supplement (doi:10.1039/c6an00237d), 2016-01-01
Supplement: c6an00237d2.pdf [file c6an00237d2.pdf]

## Supplementary Information

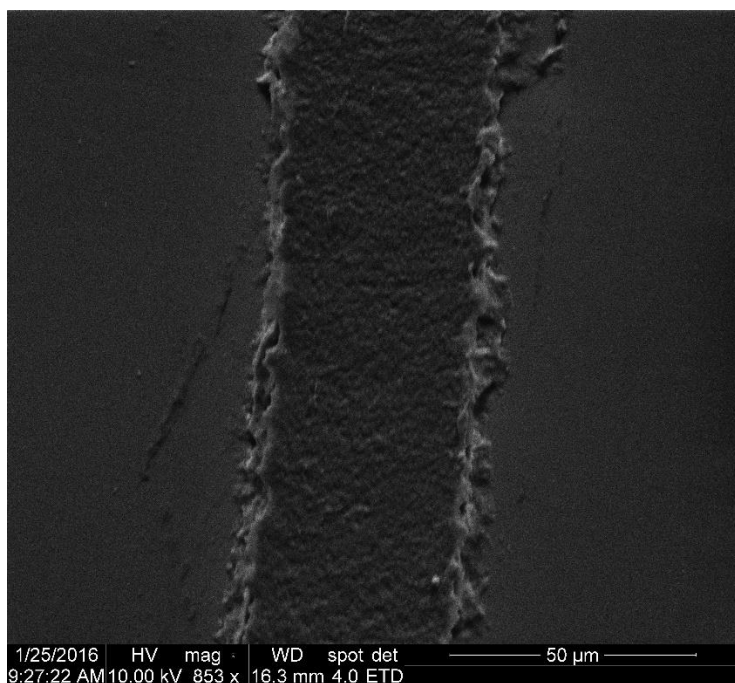

**Figure S1.** SEM of carbon ink microelectrode at 853X magnification.

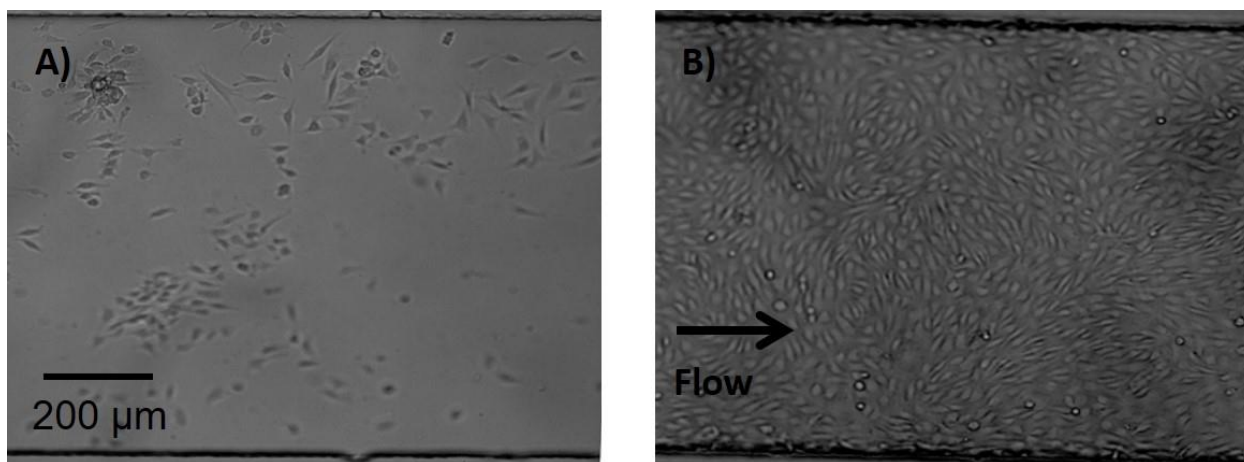

**Figure S2.** Bright field images of ECs cultured on-chip A) 48 hours after immobilization, and B) 9 days after immobilization. Flow was initiated at 50 nL/min after 1 day.

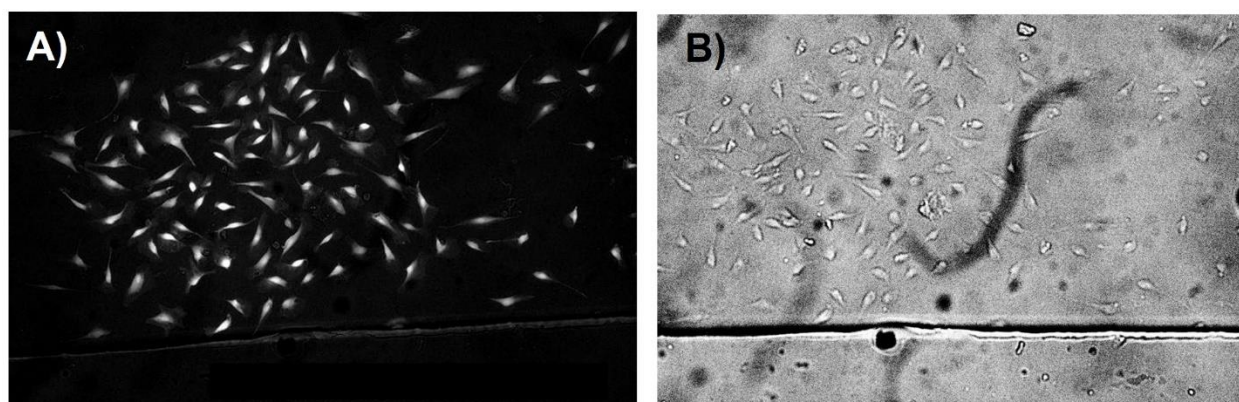

**Figure S3.** A) Fluorescence micrograph of ECs stained with calcein AM before on-chip lysis. B) Bright field image of the same region of ECs after on-chip lysis.

| Cell Type                       | Electric Field                                    | Lysis Time | Pulse Length | Comments                                                    | Reference                                               |
|---------------------------------|---------------------------------------------------|------------|--------------|-------------------------------------------------------------|---------------------------------------------------------|
| Leukocytes                      | 10 V, 4 Hz pulse<br>(Electric field not reported) | ~3 s       | 100 $\mu$ s  | Flowing cell suspension                                     | Biosensors and Bioelectronics <b>2006</b> , 22, 568–574 |
| Human epidermal cells           | 1000 V/cm                                         | 7 s        | Up to 9 s    | Flowing cell suspension                                     | Micromachines <b>2013</b> , 4, 243–256                  |
| HeLa cells                      | 30 V (Electric field not reported)                | 25 s       | N/A          | Cells patterned in microwells                               | Sensors <b>2012</b> , 12, 6967–6977                     |
| HeLa, MCF-7, Jurkat, and CHO-K1 | 11 V/cm                                           | 5 min      | N/A          | Electrical lysis of adherent cells via hydroxide generation | Lab Chip <b>2007</b> , 7, 1689–1695                     |

**Table S1.** Parameters and cell lysis times for on-chip electroporation experiments reported in the literature.
